# Supplementary material for: Photo-induced ligand substitution at a remote site via electron transfer in a porphyrin-appended rhenium carbonyl supermoleculeElectronic supplementary information (ESI) available: energy balance, synthesis and characterisation of 1+OTf– and fluorescence spectra of 1+, 2 and 5. See http://www.rsc.org/suppdata/cc/b2/b200127f/
Source: Royal Society of Chemistry journal article supplement (doi:10.1039/b200127f), 2002-04-02
Supplement: b200127f.doc [file b200127f.doc]

**Supplementary Material (ESI) for Chemical Communications**

**This journal is © The Royal Society of Chemistry 2002**

**Energy balance.** The driving force for oxidative quenching of the Zn porphyrin singlet excited state has been estimated using the following relationship: G = E½ox – E½red – E00. E½ox values for **1+**, **2** and **5** are 0.37 eV vs Fc/Fc+, E½red is  1.44 eV vs Fc/Fc+ for **1+**; for **2** the reduction potential is crudely estimated to –1.75 vs Fc/Fc+ using the peak maxima. This is close to the value of similar rhenium complexes. The energy of the first excited state Es00 is 2.06 eV, measured from the fluoresence maxima at 77 K. Using the above relationship, the driving force for electron transfer from the first singlet excited state is  0.25 eV for compound **1+** and roughly 0.06 eV for **2**.

**Synthesis of** **1+.**OTf**** Compound **2** (0.10 g, 0.081 mmol) was dissolved in a mixture of THF (10 cm3, dry), 3-Me-pyridine (0.5 cm3) and silver triflate (0.1 g, 0.4 mmol) was added. The reaction mixture was heated under argon at reflux for 1 h, the solvent was removed, the solid was redissolved in dichloromethane (3 cm3) and purified by column chromatography (Si60, dichloromethane with 20 % v/v tetrahydrofuran) to yield **1+** OTf (0.10 g, 0.071 mmol, 88 %)

1H n.m.r. (270 MHz, CDCl3):  1.22 (3 H, s, br, free 3-Me-Py CH3); 2.17 (3 H, s, bpy CH3); 2.73 (3 H, s, Re bound 3-Me-Py CH3); 7.217.26 (2 H, overlaps with CHCl3, 1 bpy and 1 3-Me-Py); 7.50 (1 H, d, 5.5 Hz); 7.61 (1 H, d, 8.3 Hz); 7.717.73 (10 H, m, 9 *m, p*phenyl and 1 bpy); 7.81 (1 H, d, 4.9 Hz); 8.088.11 (4 H, m, 2 bridging *m*phenyl and 2 3-Me-Py); 8.168.23 (9 H, m, 6 *o*phenyl, 2 bridging *o*phenyl and 1 bpy); 8.71 (1 H, s); 8.868.87 (8 H, m, 6 pyrrolic 1 bpy and 1 3-Me-Py); 8.92 (2 H, d, 4.9 Hz, pyrrolic); 9.13 (1 H, s); 9,15 (1 H, d, 5.9 Hz); 10.62 (1 H, s, br, CONH).

ESI-MS: *m/z* = 1253 (100% [M+], major contribution from C65H44N8O4187Re66Zn+), 1160 (10% [M  3-Me-Py]+).

UV-Vis (THF): max/nm (/dm3mol-1cm-1) 404 (50 400 sh), 422 (600 000) 516 (4 640), 556 (22 200) 596 (9 080).

**Fig**. **3** Emission spectra of **5**, **2** and **1+** in THF, excitation at 556 nm.
